# Supplementary material for: Seed-catalyzed heteroepitaxial growth and nonlinear optical properties of zinc selenide nanowires
Source: Royal Society of Chemistry journal article supplement (doi:10.1039/c2jm00091a), 2012-01-01
Supplement: c2jm00091a.pdf [file c2jm00091a.pdf]

## Electronic Supplementary Information (ESI)

### Seed-Catalyzed Heteroepitaxial Growth of Zinc Selenide Nanowires

Junli Wang<sup>a</sup>, Congming Yang<sup>a</sup>, Zhipeng Huang<sup>a</sup>, Mark G. Humphrey<sup>b</sup>, Ding Jia<sup>b</sup>,  
Tingting You<sup>a</sup>, Kangmin Chen<sup>a</sup>, Qing Yang<sup>c</sup>, Chi Zhang<sup>\*,a,b</sup>

<sup>a</sup> Functional Molecular Materials Research Centre, Scientific Research Academy & School of Chemistry and Chemical Engineering, Jiangsu University, Zhenjiang 212013, P. R. China. E-mail: chizhang@ujs.edu.cn

<sup>b</sup> Research School of Chemistry, Australian National University, Canberra, ACT0200, Australia

<sup>c</sup> Department of Chemistry, University of Science and Technology of China (USTC), Hefei 230026, P. R. China

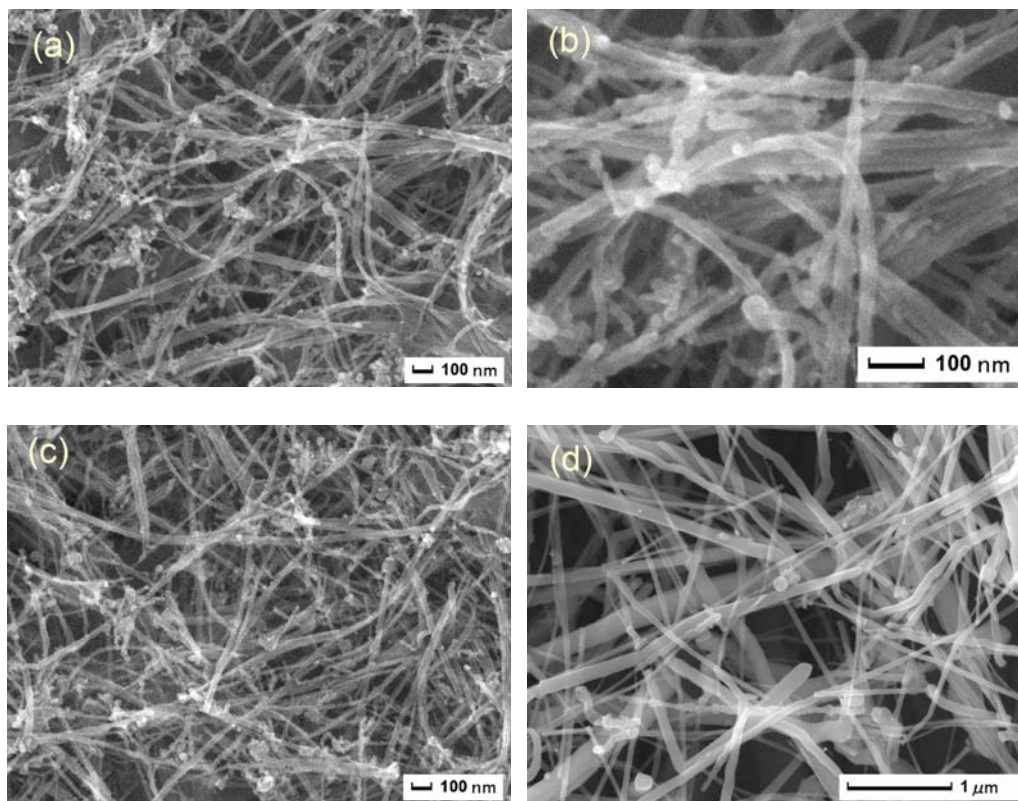

**Fig. S1.** SEM images of ZnSe nanowires synthesized under varying conditions: (a,b) 0.8 μmol AgNO<sub>3</sub>, 0.2 g PVP K30; (c) 0.8 μmol AgNO<sub>3</sub>, 0.2 g PVP K90; (d) 0.8 μmol AgNO<sub>3</sub>, without PVP.

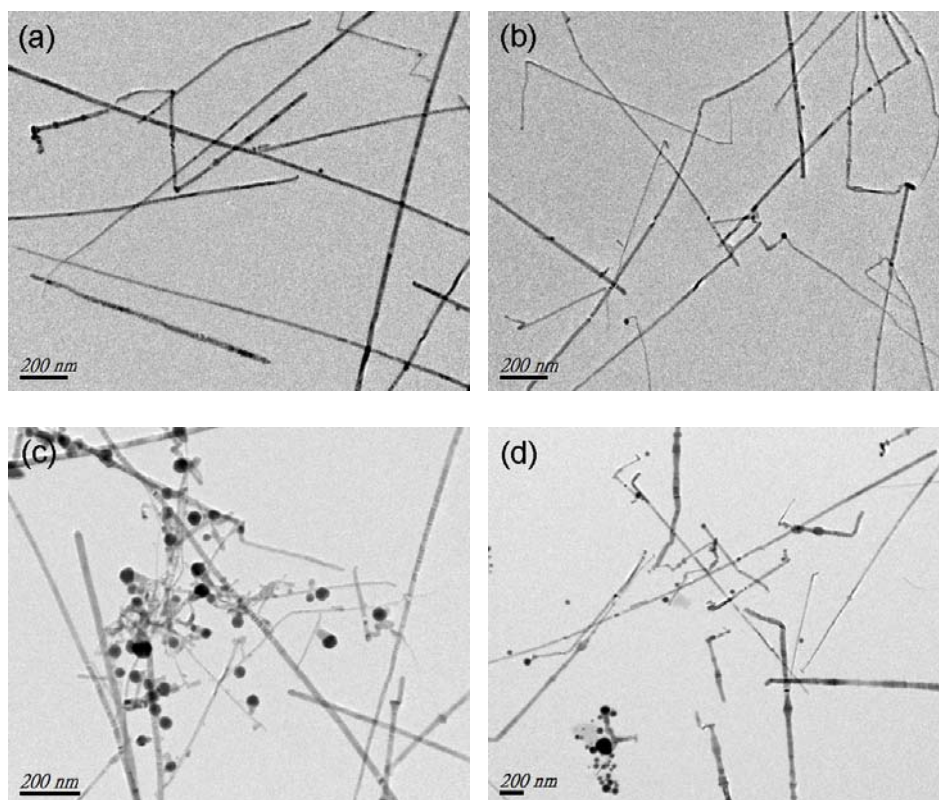

**Fig. S2.** TEM images of ZnSe nanowires fabricated by the addition of different amounts of  $\text{AgNO}_3$  ethanol solution: (a)  $0.4 \mu\text{mol}$ ; (b)  $1.6 \mu\text{mol}$ ; (c)  $4 \mu\text{mol}$ ; (d)  $12 \mu\text{mol}$ .

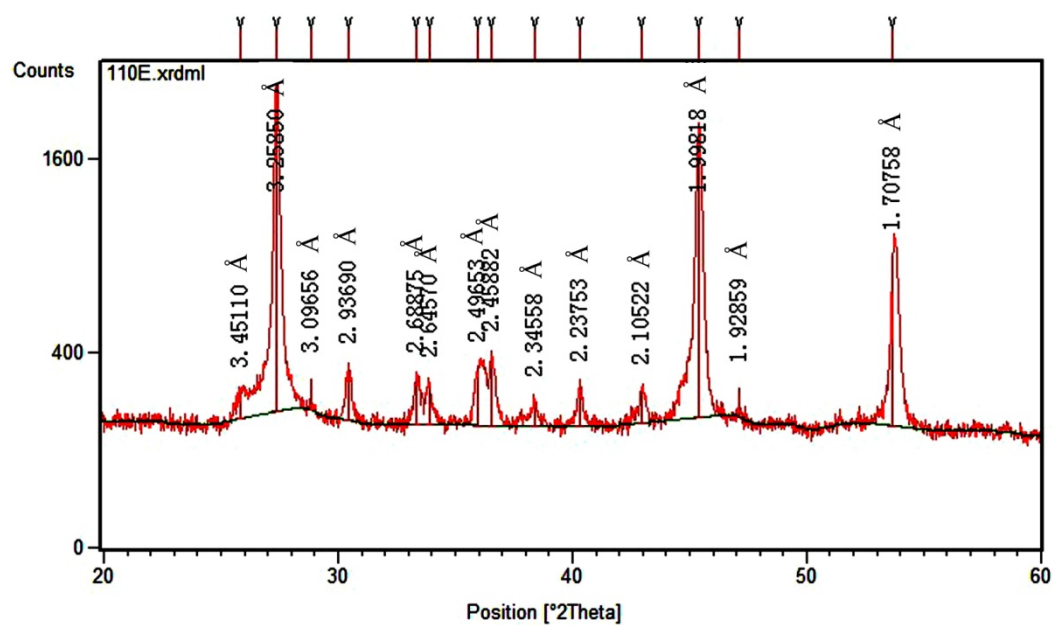

**Fig. S3.** XRD pattern of the ZnSe sample prepared by adding  $12 \mu\text{mol}$  of  $\text{AgNO}_3$ .

( $\lambda = 1.54178 \text{ \AA}$ )

| <b>2<math>\theta</math></b><br><b>(<math>^{\circ}</math>)</b> | <b><math>d_{(hkl)}</math> detected</b><br><b>(<math>\text{\AA}</math>)</b> | <b>(hkl)</b>               | <b><math>d_{(hkl)}</math> Ref. 19</b><br><b>(<math>\text{\AA}</math>)</b> |
|---------------------------------------------------------------|----------------------------------------------------------------------------|----------------------------|---------------------------------------------------------------------------|
| <b>28.833</b>                                                 | <b>3.09656</b>                                                             | <b>120</b>                 | <b>3.110417</b>                                                           |
| <b>30.437</b>                                                 | <b>2.93690</b>                                                             | <b>201</b>                 | <b>2.940243</b>                                                           |
| <b>33.324</b>                                                 | <b>2.68875</b>                                                             | <b>211</b>                 | <b>2.667181</b>                                                           |
| <b>33.833</b>                                                 | <b>2.64570</b>                                                             | <b>?</b>                   | <b>–</b>                                                                  |
| <b>35.974</b>                                                 | <b>2.49653</b>                                                             | <b>220</b>                 | <b>2.494685</b>                                                           |
| <b>36.545</b>                                                 | <b>2.45882</b>                                                             | <b>?</b>                   | <b>–</b>                                                                  |
| <b>38.377</b>                                                 | <b>2.34558</b>                                                             | <b>102</b><br><b>(300)</b> | <b>2.367861</b><br><b>(2.353333)</b>                                      |
| <b>40.308</b>                                                 | <b>2.23753</b>                                                             | <b>221</b><br><b>(310)</b> | <b>2.24857</b><br><b>(2.232568)</b>                                       |
| <b>42.963</b>                                                 | <b>2.10522</b>                                                             | <b>301</b>                 | <b>2.122223</b>                                                           |
| <b>47.124</b>                                                 | <b>1.92859</b>                                                             | <b>212</b><br><b>(320)</b> | <b>1.945014</b><br><b>(1.958092)</b>                                      |

**Table S1.** XRD assignments for the  $\text{Ag}_2\text{Se}$  diffraction data [ $2\theta = 28\text{--}50^{\circ}$ ] according to Reference 19 (in the text). These data agree closely with the diffractions of tetragonal phase  $\text{Ag}_2\text{Se}$ . The lattice parameters of tetragonal  $\text{Ag}_2\text{Se}$  are calculated as follows:  $a = b = 7.05 \text{ \AA}$  and  $c = 4.98 \text{ \AA}$ . The peaks at  $33.833^{\circ}$  and  $36.545^{\circ}$  ( $2\theta$ ) cannot be assigned on the basis of Reference 19, and they may result from another crystalline phase that has not been identified.

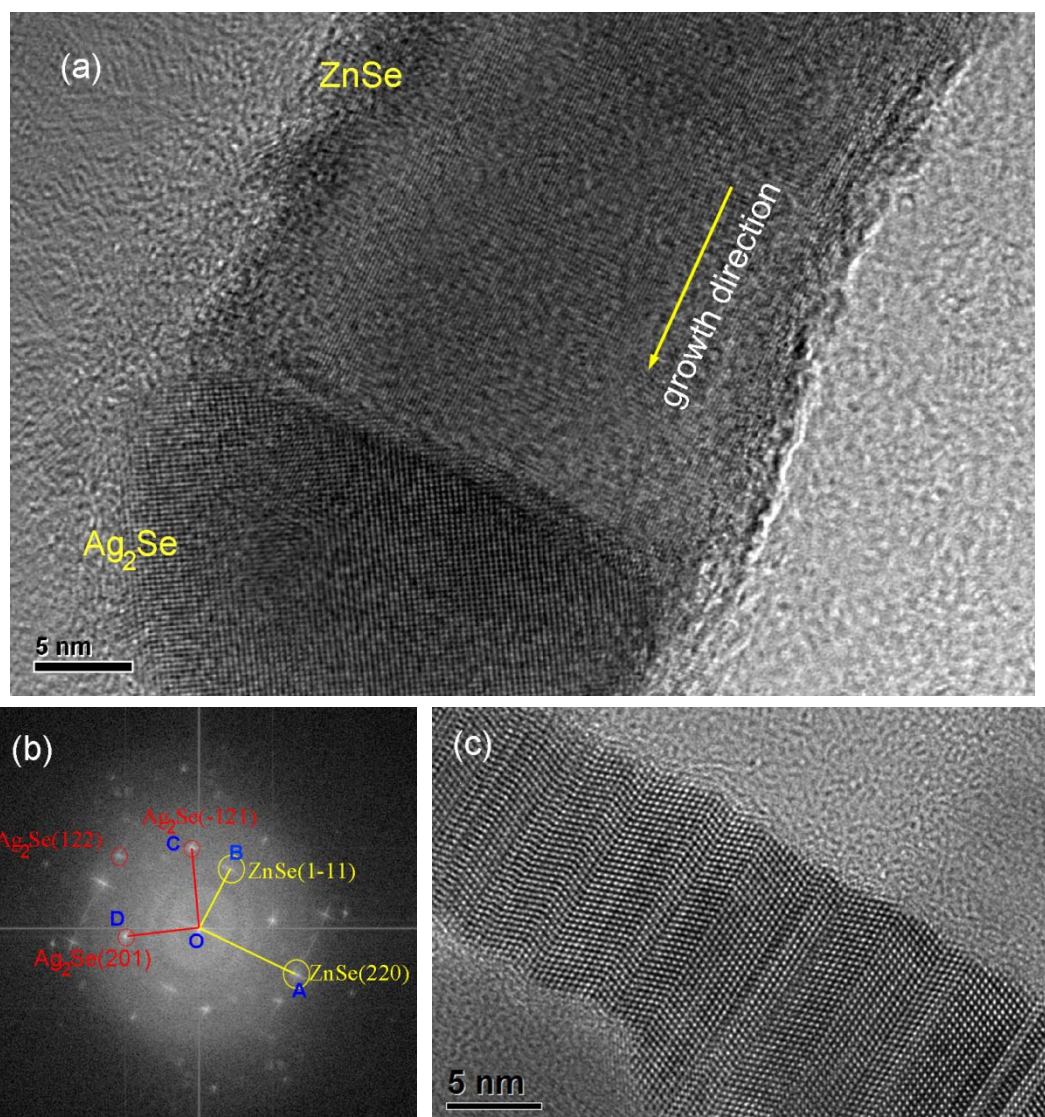

**Fig. S4.** (a) HRTEM image of the interface of the Ag<sub>2</sub>Se tip and the ZnSe wire; (b) FFT pattern of the HRTEM image in (a); (c) HRTEM image of the ZnSe nanowire, showing the periodically twinned structure along the growth direction (i.e., the  $\langle 111 \rangle$  direction).

In the FFT pattern shown in Figure S3b, the ratio of OA/OB is close to 1.63 and  $\angle AOB$  is  $90^\circ$ . As a result, the B diffraction spot can be assigned to the ZnSe(1-11) plane when the A diffraction spot is assigned to the (220) plane of cubic ZnSe. The (1-11) and (220) planes belong to the  $[-112]$  zone axis of cubic ZnSe. We therefore conclude that the  $\langle 111 \rangle$  direction is the growth direction of the ZnSe nanowires.

From analysis of the HRTEM image and the corresponding FFT pattern, the D diffraction spot can be assigned to the Ag<sub>2</sub>Se(201) plane (the measured  $d$ -value is 2.94

Å, consistent with the data in Table S1), with  $\angle\text{COD} = 90.46^\circ$ . The  $d$ -value corresponding to the C diffraction spot is 2.67 Å, which could ordinarily be assigned to the  $\text{Ag}_2\text{Se}(211)$  plane (Table S1). However, the dihedral angle between the (201) and (211) planes of tetragonal  $\text{Ag}_2\text{Se}$  ( $a = 7.05$  Å and  $c = 4.98$  Å) is far from  $90^\circ$ . The (121), (211), and (-121) planes are equivalent in a tetragonal structure and have the same interplanar spacing ( $d$ -value). The C diffraction spot can therefore be assigned to the (-121) plane, the  $\angle\text{COD}$  between the  $\text{Ag}_2\text{Se}(201)$  and  $\text{Ag}_2\text{Se}(-121)$  planes being very close to  $90^\circ$ .

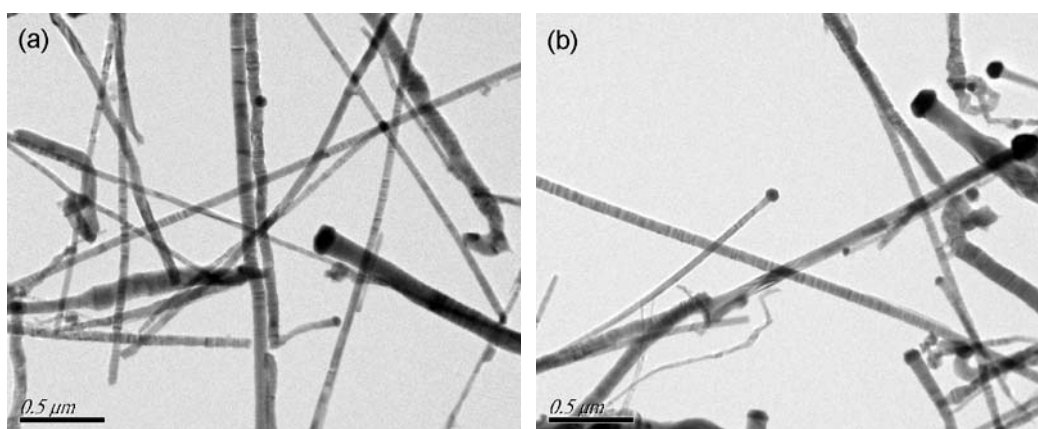

**Fig. S5.** TEM images of the ZnSe samples synthesized from (a) 0.8  $\mu\text{mol}$  and (b) 2  $\mu\text{mol}$   $\text{AgNO}_3$  using PVP K16-18.

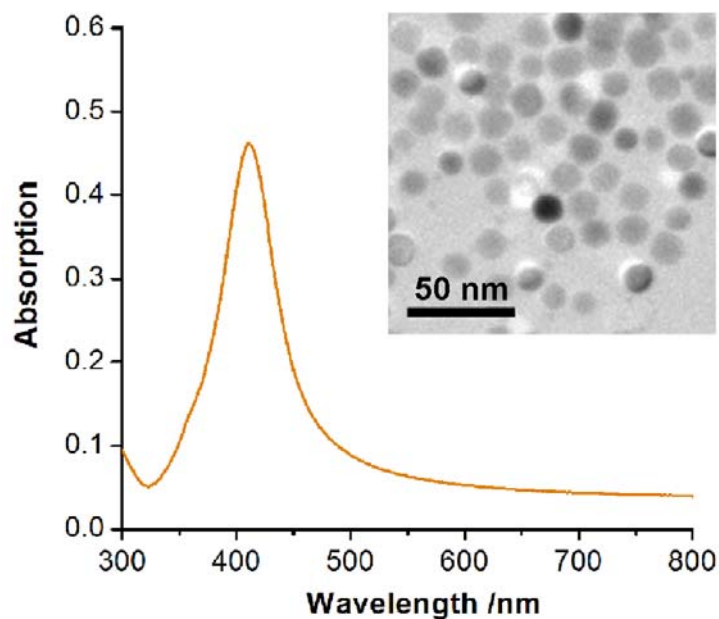

**Fig. S6.** UV-vis absorption spectrum and TEM image of Ag nanoparticles obtained by using PVP (K30, 0.2 g) and  $\text{AgNO}_3$  (10  $\mu\text{mol}$ ) in a mixture of oleic acid and ethanol (7.5 mL) at 210 °C for 1 h. The absorption peak at 411 nm is attributed to the surface plasmon resonance (SPR) band of the Ag nanoparticles. The mean diameter of the Ag nanoparticles is about 16 nm. The Ag nanoparticles cannot be obtained on removing PVP while keeping the other conditions constant, and the corresponding SPR absorption cannot be detected in the UV-Vis spectrum.

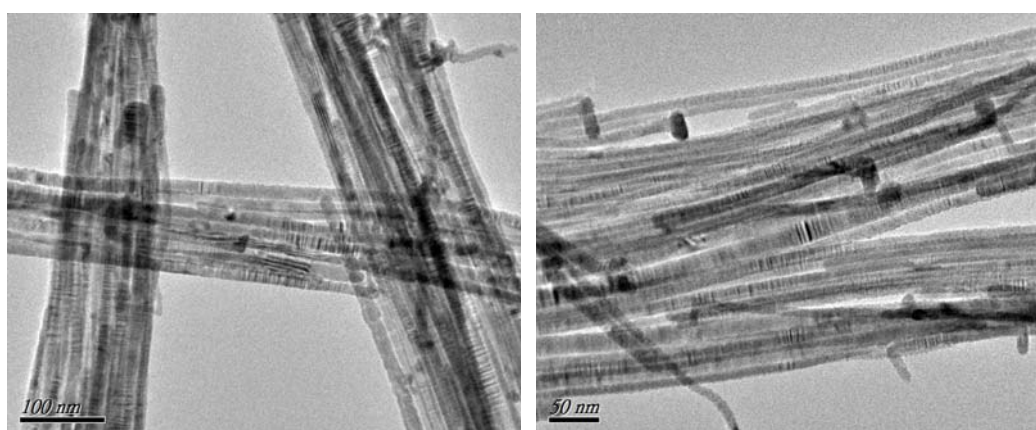

**Fig. S7.** TEM images of ZnSe nanowires synthesized from 0.8  $\mu\text{mol}$   $\text{AgNO}_3$  and 2 mL oleylamine (OA) in a mixture of oleic acid and ethanol (8 mL). The high aspect-ratio wires display an ordered arrangement along the long axis.
